# Supplementary material for: Investigation of the Genetic Architecture of Pigs Subjected to Breeding Intensification
Source: MDPI journal article supplement (doi:10.3390/genes13020197), 2022-01-22
Supplement: s1 [file s1]

Table S2. Summary statistics of realized autozygosity in each HBD class (as a percentage of genome).

|        |      | mean   | sd     | min    | max    | range  | se     |
|--------|------|--------|--------|--------|--------|--------|--------|
| R_4    | LW_A | 0,0043 | 0,0148 | 0,0000 | 0,0725 | 0,0725 | 0,0029 |
|        | LW_B | 0,0050 | 0,0149 | 0,0000 | 0,0697 | 0,0697 | 0,0028 |
| R_8    | LW_A | 0,0127 | 0,0216 | 0,0000 | 0,0839 | 0,0839 | 0,0042 |
|        | LW_B | 0,0275 | 0,0346 | 0,0000 | 0,1078 | 0,1078 | 0,0064 |
| R_16   | LW_A | 0,0329 | 0,0273 | 0,0000 | 0,0813 | 0,0813 | 0,0054 |
|        | LW_B | 0,0557 | 0,0536 | 0,0000 | 0,1464 | 0,1464 | 0,0100 |
| R_32   | LW_A | 0,0304 | 0,0260 | 0,0000 | 0,0814 | 0,0814 | 0,0051 |
|        | LW_B | 0,0587 | 0,0552 | 0,0000 | 0,1808 | 0,1808 | 0,0103 |
| R_64   | LW_A | 0,0159 | 0,0297 | 0,0000 | 0,0909 | 0,0909 | 0,0058 |
|        | LW_B | 0,0386 | 0,0470 | 0,0000 | 0,1427 | 0,1427 | 0,0087 |
| R_128  | LW_A | 0,0529 | 0,0350 | 0,0000 | 0,1328 | 0,1328 | 0,0069 |
|        | LW_B | 0,0968 | 0,0363 | 0,0000 | 0,1575 | 0,1575 | 0,0067 |
| R_256  | LW_A | 0,0538 | 0,0231 | 0,0000 | 0,0976 | 0,0976 | 0,0045 |
|        | LW_B | 0,0063 | 0,0128 | 0,0000 | 0,0546 | 0,0546 | 0,0024 |
| R_512  | LW_A | 0,0000 | 0,0000 | 0,0000 | 0,0000 | 0,0000 | 0,0000 |
|        | LW_B | 0,0000 | 0,0000 | 0,0000 | 0,0000 | 0,0000 | 0,0000 |
| NonHBD | LW_A | 0,7933 | 0,0246 | 0,7455 | 0,8520 | 0,1065 | 0,0048 |
|        | LW_B | 0,7114 | 0,0303 | 0,6666 | 0,7797 | 0,1131 | 0,0056 |
